# Supplementary material for: Transcriptomics and Metabonomics Identify Essential Metabolic Signatures in Calorie Restriction (CR) Regulation across Multiple Mouse Strains
Source: Metabolites. 2013 Oct 11;3(4):881–911. doi: 10.3390/metabo3040881 (PMC3937836; doi:10.3390/metabo3040881)
Supplement: Supplementary File 1 — Supplementary (XLSX, 26 KB) [file metabolites-03-00881-s001.xlsx]

## Sheet: C57BL6J-Metabolomics
liver hydrophilic(NMR)	Valine (AUC-peakIntegral)	Isoleucine(AUC-peakIntegral)	GSH(AUC-peakIntegral)	Carnosine(AUC-peakIntegral)	Uridine(AUC-peakIntegral)	Phe(AUC-peakIntegral)	Nicotinurate(AUC-peakIntegral)	DMG(AUC-peakIntegral)		LiverOrganic(NMR)	Chol free(AUC-peakIntegral)	Chol tot(AUC-peakIntegral)	SM(AUC-peakIntegral)	Omega 3 FA(AUC-peakIntegral)	UFA(AUC-peakIntegral)	Retyl conj(AUC-peakIntegral)	FA chain(AUC-peakIntegral)	TAG(AUC-peakIntegral)
'control'	4.90469e-06	1.28398e-06	3.54295e-06	2.2618e-06	1.85154e-06	1.06775e-06	9.66965e-07	3.94875e-07		'control'	1.67505e-06	1.92395e-06	9.83559e-08	4.65849e-06	2.5412e-05	3.46089e-08	0.000375006	4.33746e-06
'control'	3.34092e-06	8.11254e-07	2.09244e-06	1.77191e-06	1.94049e-06	1.56012e-06	3.14381e-07	2.36755e-07		'control'	7.47073e-07	9.62753e-07	-2.35558e-10	2.12685e-06	2.79618e-05	7.60873e-09	0.000444457	5.69885e-06
'control'	5.64851e-06	1.60636e-06	4.00864e-06	3.01357e-06	2.18322e-06	1.3011e-06	1.30447e-06	4.01236e-07		'control'	9.62073e-07	1.17528e-06	3.4104e-08	3.1975e-06	2.72006e-05	1.51357e-08	0.000418197	5.88799e-06
'control'	3.94517e-06	1.09455e-06	3.03275e-06	2.58451e-06	1.86824e-06	1.11542e-06	1.2772e-06	2.75611e-07		'control'	1.10035e-06	1.38777e-06	3.2152e-08	3.03643e-06	2.77851e-05	1.42443e-08	0.000416325	5.42729e-06
'control'	3.4227e-06	1.33509e-06	2.73013e-06	3.0382e-06	2.34967e-06	1.68028e-06	1.85891e-06	4.61528e-07		'control'	1.44196e-06	1.82929e-06	7.87809e-08	3.26483e-06	2.57374e-05	3.4238e-08	0.000402343	4.77182e-06
'control'	4.59828e-06	1.17019e-06	3.82959e-06	2.37655e-06	1.90989e-06	1.00489e-06	1.26023e-06	3.67757e-07		'control'	1.10629e-06	1.43697e-06	4.78729e-08	3.43908e-06	2.74791e-05	1.70427e-08	0.000414581	5.64831e-06
'control'	3.82664e-06	1.1094e-06	3.15775e-06	2.82128e-06	1.986e-06	1.70158e-06	1.51449e-06	3.83635e-07		'control'	1.26973e-06	1.46807e-06	7.39658e-08	3.92842e-06	2.6228e-05	2.637e-08	0.000395379	4.9949e-06
'control'	3.14171e-06	7.53153e-07	2.61549e-06	2.79153e-06	2.14347e-06	1.58166e-06	1.61226e-06	4.13785e-07		'control'	8.58062e-07	1.08976e-06	2.04496e-08	2.4529e-06	2.72926e-05	1.03637e-08	0.000434913	5.93375e-06
'control'	3.4607e-06	9.19867e-07	4.51609e-06	2.6077e-06	1.11296e-06	1.18206e-06	1.20033e-06	3.96108e-07		'control'	1.35091e-06	1.54307e-06	9.28768e-08	4.16751e-06	2.52864e-05	3.09323e-08	0.000388016	4.79769e-06
'control'	6.94519e-06	2.01095e-06	4.96481e-06	5.05926e-06	3.69026e-06	1.50869e-06	1.81717e-06	7.10217e-07		'control'	1.84092e-06	2.0312e-06	1.17286e-07	4.73476e-06	2.46559e-05	4.59057e-08	0.000366873	4.1181e-06
'control'	4.4566e-06	1.28896e-06	2.8515e-06	2.99786e-06	2.32985e-06	1.08884e-06	1.52762e-06	4.97047e-07		'control'	1.31988e-06	1.75122e-06	8.33779e-08	3.24193e-06	2.57828e-05	3.29827e-08	0.000408089	5.08565e-06
'control'	3.84499e-06	1.10494e-06	2.79662e-06	2.74836e-06	2.01179e-06	9.82965e-07	1.06455e-06	3.20793e-07		'control'	1.25654e-06	1.57223e-06	3.76605e-08	3.54492e-06	2.66669e-05	2.81314e-08	0.000408524	5.23921e-06
'control'	4.79058e-06	1.34027e-06	3.50913e-06	2.91489e-06	2.03723e-06	1.14782e-06	1.47793e-06	2.65033e-07		'control'	1.05619e-06	1.30741e-06	2.997e-08	3.18131e-06	2.74669e-05	1.84933e-08	0.000419131	5.71388e-06
'control'	7.60959e-06	1.25522e-06	6.34811e-06	3.07304e-06	2.10836e-06	9.2612e-07	1.67122e-06	3.99716e-07		'control'	1.26609e-06	1.53988e-06	6.13526e-08	3.67047e-06	2.57257e-05	3.25724e-08	0.000400063	5.0677e-06
'control'	4.22603e-06	1.19364e-06	3.26702e-06	2.88577e-06	2.13062e-06	1.03488e-06	1.1872e-06	3.37347e-07		'control'	1.61736e-06	2.0121e-06	8.96699e-08	3.90021e-06	2.45588e-05	3.65954e-08	0.000386154	4.36851e-06
'CR'	7.85215e-06	2.11704e-06	5.27005e-06	5.68863e-06	2.3345e-06	1.31714e-06	2.26986e-06	7.8024e-07		'CR'	3.33285e-06	3.55034e-06	1.93548e-07	5.79194e-06	1.98633e-05	1.0942e-07	0.000319918	1.84665e-06
'CR'	1.0005e-05	2.34938e-06	1.02705e-05	4.44442e-06	2.02636e-06	1.14576e-06	2.50487e-06	4.75061e-07		'CR'	3.48661e-06	3.74624e-06	2.44058e-07	5.9304e-06	1.96047e-05	1.16167e-07	0.000308812	1.50158e-06
'CR'	6.61898e-06	2.1508e-06	8.84838e-06	4.27812e-06	2.22952e-06	9.91143e-07	2.07563e-06	5.25384e-07		'CR'	3.33184e-06	3.92969e-06	1.79187e-07	5.96432e-06	2.07563e-05	9.79906e-08	0.00031802	1.93709e-06
'CR'	7.36406e-06	2.19934e-06	9.17716e-06	3.93658e-06	2.19437e-06	8.82287e-07	1.90812e-06	5.46018e-07		'CR'	2.90875e-06	3.07773e-06	1.73115e-07	5.30048e-06	2.14533e-05	9.21711e-08	0.000334294	2.37128e-06
'CR'	3.83251e-06	1.08747e-06	2.78577e-06	4.34691e-06	2.59115e-06	1.09634e-06	2.13783e-06	3.71492e-07		'CR'	3.64811e-06	4.06739e-06	2.23881e-07	6.09302e-06	1.93316e-05	9.97169e-08	0.000310173	1.64434e-06
'CR'	8.25692e-06	2.20955e-06	6.51772e-06	4.56017e-06	2.24946e-06	1.20722e-06	2.49553e-06	5.69981e-07		'CR'	3.31146e-06	3.47951e-06	2.17799e-07	6.2165e-06	1.97829e-05	1.10417e-07	0.000317458	1.7671e-06
'CR'	8.66652e-06	2.35551e-06	5.17956e-06	5.62299e-06	2.98377e-06	1.22083e-06	2.09034e-06	8.74914e-07		'CR'	3.25514e-06	3.60377e-06	1.91255e-07	6.18246e-06	2.00699e-05	1.01424e-07	0.000323125	2.05368e-06
'CR'	9.17196e-06	2.45085e-06	5.50018e-06	6.39087e-06	3.20538e-06	1.53413e-06	3.12622e-06	8.36837e-07		'CR'	3.50446e-06	3.84625e-06	2.06674e-07	6.36606e-06	2.10595e-05	1.06333e-07	0.000318622	1.9928e-06
'CR'	8.00175e-06	2.05939e-06	6.25605e-06	5.07861e-06	2.29868e-06	1.15698e-06	3.10748e-06	5.98436e-07		'CR'	3.29219e-06	3.6533e-06	2.1132e-07	5.82155e-06	2.06575e-05	1.11514e-07	0.000324062	2.05131e-06
'CR'	1.0625e-05	2.39707e-06	8.79519e-06	4.50591e-06	2.16499e-06	1.07932e-06	2.84712e-06	6.29715e-07		'CR'	2.75156e-06	3.09742e-06	1.39122e-07	5.42551e-06	2.13689e-05	7.55803e-08	0.000345887	3.04225e-06
'CR'	7.23915e-06	2.10829e-06	6.11105e-06	4.9434e-06	2.274e-06	1.29919e-06	3.64185e-06	5.78573e-07		'CR'	3.32937e-06	4.11064e-06	2.2174e-07	5.38686e-06	1.95607e-05	1.07948e-07	0.000318124	1.68421e-06
'CR'	4.7857e-06	1.02777e-06	6.70279e-06	2.49725e-06	9.16632e-07	5.42985e-07	1.77803e-06	7.76957e-07		'CR'	2.50456e-06	3.39601e-06	1.48502e-07	4.68742e-06	2.22265e-05	6.47862e-08	0.000350308	3.10723e-06
'CR'	3.98693e-06	9.96988e-07	5.21659e-06	3.67804e-06	9.62358e-07	6.47508e-07	2.37404e-06	5.76615e-07		'CR'	3.01174e-06	3.92939e-06	1.82905e-07	5.09729e-06	1.87331e-05	6.97996e-08	0.000304735	2.05424e-06
'CR'	6.44887e-06	1.12953e-06	7.59866e-06	2.14885e-06	6.51614e-07	4.6431e-07	2.49133e-06	5.62395e-07		'CR'	2.85646e-06	3.97717e-06	1.41527e-07	5.09287e-06	2.07702e-05	7.20129e-08	0.000331118	2.65488e-06
'CR'	3.83542e-06	9.66954e-07	4.73197e-06	3.63914e-06	1.3565e-06	6.42114e-07	1.75724e-06	5.05669e-07		'CR'	2.63314e-06	3.52488e-06	1.3228e-07	4.84428e-06	2.22949e-05	7.04606e-08	0.000351681	3.13597e-06
Urine(NMR)	Fucose(AUC-peakIntegral)	allantoin(AUC-peakIntegral)	alpha-ketogluterate(AUC-peakIntegral)	taurine(AUC-peakIntegral)	uracil(AUC-peakIntegral)	pseudouridine(AUC-peakIntegral)	1-methylnicotinamide(AUC-peakIntegral)	PAG(AUC-peakIntegral)	deoxycytidine(AUC-peakIntegral)
'control'	2.7512e-06	6.02111e-06	1.20196e-06	4.92897e-05	6.11298e-07	4.73326e-07	1.8412e-07	1.47963e-06	3.68687e-07
'control'	3.19652e-06	7.13835e-06	1.30346e-06	4.54495e-05	4.96696e-07	5.81646e-07	2.12791e-07	1.55422e-06	3.88376e-07
'control'	2.80341e-06	7.64154e-06	1.22605e-06	5.54876e-05	8.33575e-07	5.91489e-07	2.22163e-07	2.04954e-06	4.33276e-07
'control'	2.95036e-06	4.78388e-06	1.16178e-06	4.83704e-05	5.47154e-07	4.72331e-07	2.29481e-07	9.5845e-07	3.74206e-07
'control'	3.27605e-06	6.47021e-06	1.36225e-06	4.56299e-05	5.49982e-07	5.94965e-07	2.6091e-07	1.68833e-06	3.88798e-07
'control'	2.62561e-06	3.15995e-06	9.96404e-07	4.13626e-05	6.32463e-07	4.30954e-07	2.05875e-07	1.68484e-06	3.50638e-07
'control'	2.84016e-06	5.47077e-06	1.16222e-06	4.81732e-05	5.09299e-07	4.71258e-07	2.22415e-07	1.50409e-06	3.86251e-07
'control'	2.59115e-06	5.43725e-06	9.67242e-07	5.01927e-05	6.61255e-07	5.19867e-07	2.29178e-07	1.38358e-06	4.19883e-07
'control'	2.75988e-06	3.02632e-06	1.05515e-06	4.87763e-05	6.40626e-07	4.33654e-07	2.30494e-07	1.03432e-06	4.62554e-07
'control'	3.06461e-06	5.41621e-06	1.23638e-06	3.60222e-05	5.00959e-07	5.02618e-07	2.02689e-07	1.42142e-06	3.7281e-07
'control'	2.72309e-06	3.98082e-06	9.99584e-07	4.00207e-05	5.87583e-07	4.61397e-07	2.22215e-07	1.5457e-06	4.19735e-07
'control'	3.21859e-06	4.36411e-06	1.27399e-06	3.40831e-05	4.93272e-07	5.11697e-07	2.12637e-07	1.30805e-06	3.90497e-07
'control'	2.87013e-06	5.46923e-06	1.14021e-06	5.49846e-05	8.73104e-07	5.57511e-07	2.60992e-07	2.13636e-06	4.19782e-07
'control'	3.00989e-06	4.89308e-06	1.1719e-06	4.91751e-05	4.96861e-07	4.59389e-07	2.2274e-07	9.20182e-07	3.64626e-07
'control'	2.88103e-06	3.21339e-06	1.17825e-06	4.72924e-05	5.02674e-07	4.35897e-07	2.11553e-07	1.4378e-06	3.85479e-07
'CR'	3.58111e-06	4.85092e-06	1.59074e-06	5.51936e-05	8.20876e-07	4.85679e-07	1.52555e-07	1.8266e-06	5.18735e-07
'CR'	3.79066e-06	9.72641e-06	1.75427e-06	4.98998e-05	8.78688e-07	6.46544e-07	3.90771e-07	2.32873e-06	1.19718e-06
'CR'	3.18577e-06	9.3884e-06	1.85615e-06	4.58656e-05	6.52754e-07	6.11413e-07	3.03118e-07	1.6753e-06	7.68975e-07
'CR'	4.47042e-06	1.1671e-05	2.00131e-06	6.05919e-05	8.96183e-07	6.59029e-07	3.33351e-07	2.04323e-06	6.52543e-07
'CR'	3.36617e-06	6.60474e-06	1.82364e-06	4.43239e-05	9.81687e-07	6.35029e-07	4.08884e-07	2.19772e-06	6.79774e-07
'CR'	4.12884e-06	1.39127e-05	1.58934e-06	9.00612e-05	5.84242e-07	7.28601e-07	2.84188e-07	1.70832e-06	5.24875e-07
'CR'	4.48798e-06	9.74472e-06	1.69361e-06	5.96163e-05	7.34398e-07	8.69467e-07	5.04679e-07	1.99097e-06	7.80487e-07
'CR'	4.10283e-06	1.28553e-05	2.16268e-06	4.17735e-05	7.99727e-07	8.36893e-07	4.7954e-07	2.14169e-06	8.58298e-07
'CR'	4.33623e-06	7.90313e-06	2.08234e-06	6.33749e-05	1.35595e-06	6.55754e-07	3.61338e-07	2.48626e-06	5.02156e-07
'CR'	3.10423e-06	8.53752e-06	1.54431e-06	0.000105697	7.34988e-07	6.29527e-07	3.1032e-07	1.93618e-06	6.72531e-07
'CR'	3.94072e-06	1.08955e-05	1.61169e-06	7.42306e-05	8.12152e-07	7.6186e-07	3.41998e-07	1.94326e-06	5.18974e-07
'CR'	4.1606e-06	9.21746e-06	1.6932e-06	8.11991e-05	7.31267e-07	7.66921e-07	4.51549e-07	2.02323e-06	6.41741e-07
'CR'	3.50239e-06	7.72651e-06	1.39342e-06	8.47889e-05	7.67615e-07	6.20465e-07	3.01683e-07	2.00439e-06	5.64601e-07
'CR'	3.85617e-06	7.0747e-06	1.62948e-06	9.96002e-05	6.42843e-07	5.88985e-07	2.71698e-07	1.50755e-06	5.92561e-07
'CR'	4.05877e-06	9.15396e-06	1.63595e-06	0.000102783	9.75433e-07	6.3182e-07	2.80765e-07	2.0242e-06	5.2404e-07
Plasma-MS	C14:1(Conc. in µM)	C18:1(Conc. in µM)	PC 34:3(Conc. in µM)	PC 36:1(Conc. in µM)	PC 36:5(Conc. in µM)	PC 40:4(Conc. in µM)	PC-O 34:1(Conc. in µM)	PC-O 38:0(Conc. in µM)	PC -O C40:5(Conc. in µM)	Sugar-Hexose(Conc. in µM)
Control	0.277	0.537	5.13	27.9	2.47	1.67	3.42	4.31	0.958	5498
Control	0.208	0.494	7.14	25.7	3.08	1.46	3.75	3.49	1.14	3732
Control	0.218	0.407	4.71	20.8	2.82	1.37	2.73	3.08	1.19	6412
Control	0.207	0.394	6.52	27.8	2.98	1.3	2.89	3.52	1.17	5574
Control	0.264	0.507	5.77	26.5	2.98	2.03	3.3	3.09	1.61	6929
Control	0.24	0.503	9.33	29.5	5.46	2.17	4.52	6.03	1.12	6303
Control	0.195	0.352	5	22.3	3.95	1.37	3.25	3.81	1.14	6528
Control	0.242	0.435	8.26	23.5	3.59	1.63	2.9	4.34	0.966	8244
Control	0.142	0.345	8.76	18.6	4.24	1.53	3.35	3.49	1.25	4748
CR	0.144	0.206	1.91	17.9	1.62	0.802	2.66	1.77	0.698	3072
CR	0.133	0.227	2.48	15.5	1.3	1.3	2.14	1.86	0.544	3052
CR	0.12	0.242	3.17	15.4	1.51	1.37	2.21	1.83	0.648	4533
CR	0.098	0.198	2.71	16.6	1.74	1.36	2.03	1.77	0.698	4924
CR	0.097	0.106	3.31	17.9	2.31	1.39	2.87	2.57	0.914	28.1
CR	0.207	0.296	5.4	19.6	3.06	1.57	3.17	3.48	0.978	3720
CR	0.159	0.315	5.05	15.8	2.98	1.06	3.49	2.9	1.09	4588
CR	0.193	0.264	2.86	14.2	1.79	0.892	1.96	2.33	0.604	3616
CR	0.112	0.198	3.4	16.1	2.1	1.29	2.86	2.1	0.822	3421
CR	0.128	0.211	4.63	15.6	2.45	1.35	2.86	2.56	0.88	4391
